# Supplementary material for: Declining suspended sediment in United States rivers and streams: Linking sediment trends to changes in land use/cover, hydrology and climate
Source: Copernicus journal article supplement (doi:10.5194/hess-2019-435), 2019-09-20
Supplement: Supplementary file 1 [file hess-2019-435-supplement.pdf]

# Supplemental material for

Declining suspended sediment in US rivers and streams: Linking sediment trends to changes in land use/cover, hydrology and climate  
by Jennifer Murphy

## Categorization scheme for determining predominate land use of each site’s contributing watershed

| Land-use category | Rules for classification                                                                                                                                                                                 |
|-------------------|----------------------------------------------------------------------------------------------------------------------------------------------------------------------------------------------------------|
| Undeveloped       | Undeveloped:<br>$(lu\_11 + lu\_12 + lu\_46 + lu\_50 + lu\_60) > 75\%$                                                                                                                                    |
| Urban             | Urban:<br>$lu\_43 < 25\%$ AND $(lu\_43 + lu\_44) < 50\%$ , plus satisfying at least one of the “high”, “med” or “low” urbanization rules below                                                           |
|                   | High urbanization:<br>$(lu\_21 + lu\_22 + lu\_23 + lu\_24 + lu\_25 + lu\_26 + lu\_27) > 50\%$ OR<br>$lu\_21 + lu\_22 + lu\_23 + lu\_25) > 25\%$                                                          |
|                   | Medium urbanization:<br>$(lu\_21 + lu\_22 + lu\_23 + lu\_24 + lu\_25 + lu\_26 + lu\_27) > 25\%$                                                                                                          |
|                   | Low urbanization:<br>$(lu\_21 + lu\_22 + lu\_23 + lu\_24 + lu\_25 + lu\_26 + lu\_27) > 12.5\%$ AND<br>$(lu\_21 + lu\_22 + lu\_23 + lu\_24 + lu\_25 + lu\_26 + lu\_27 + lu\_31 + lu\_32 + lu\_33) > 25\%$ |
| Ag                | Agricultural:<br>$(lu\_21 + lu\_22 + lu\_23 + lu\_24 + lu\_25 + lu\_26 + lu\_27) < 10\%$ , plus satisfying at least one of the “high”, “med” or “low” ag rules below.                                    |
|                   | High ag: $lu\_43 > 50\%$ OR $(lu\_43 + lu\_44) > 75\%$                                                                                                                                                   |
|                   | Medium ag: $lu\_43 > 25\%$ OR $(lu\_43 + lu\_44) > 50\%$                                                                                                                                                 |
|                   | Low ag: $lu\_43 > 12.5\%$ AND $(lu\_43 + lu\_44) > 25\%$                                                                                                                                                 |
| Mixed High        | Does not meet criteria for Undeveloped, Urban, or Ag                                                                                                                                                     |

Land-use categorization is based on the scheme used in Falcone (2015). The specific land uses associated with the “lu\_XX” codes can be found in the Falcone (2015) report and related dataset.

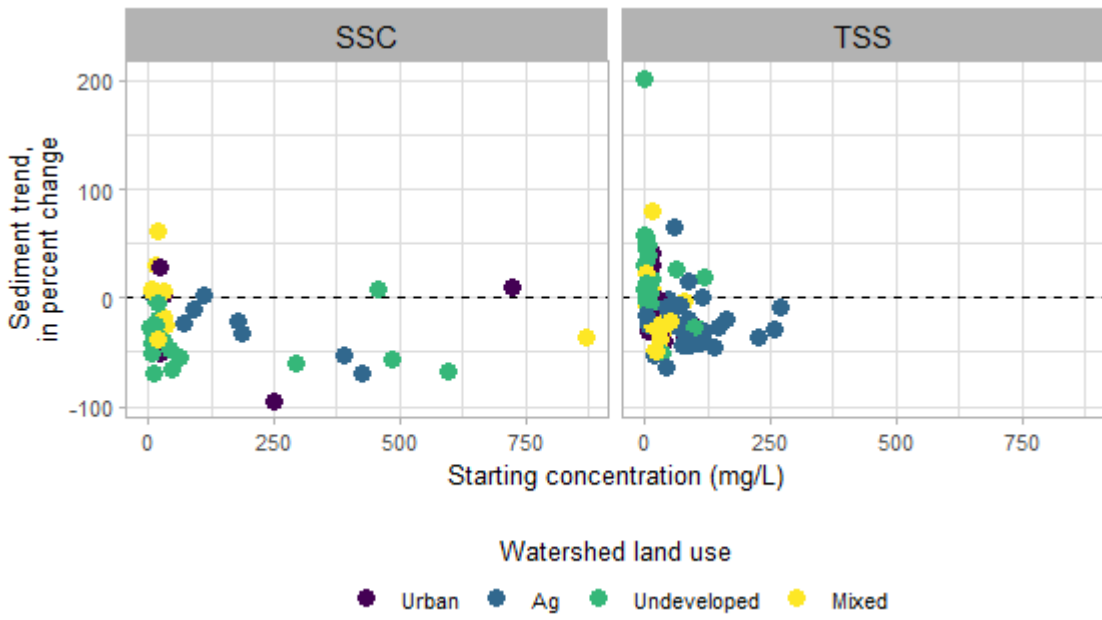

Figure SM-1. Sediment trend (1992-2012) in percent change versus starting concentration (1992), by sediment parameter and land-use category.

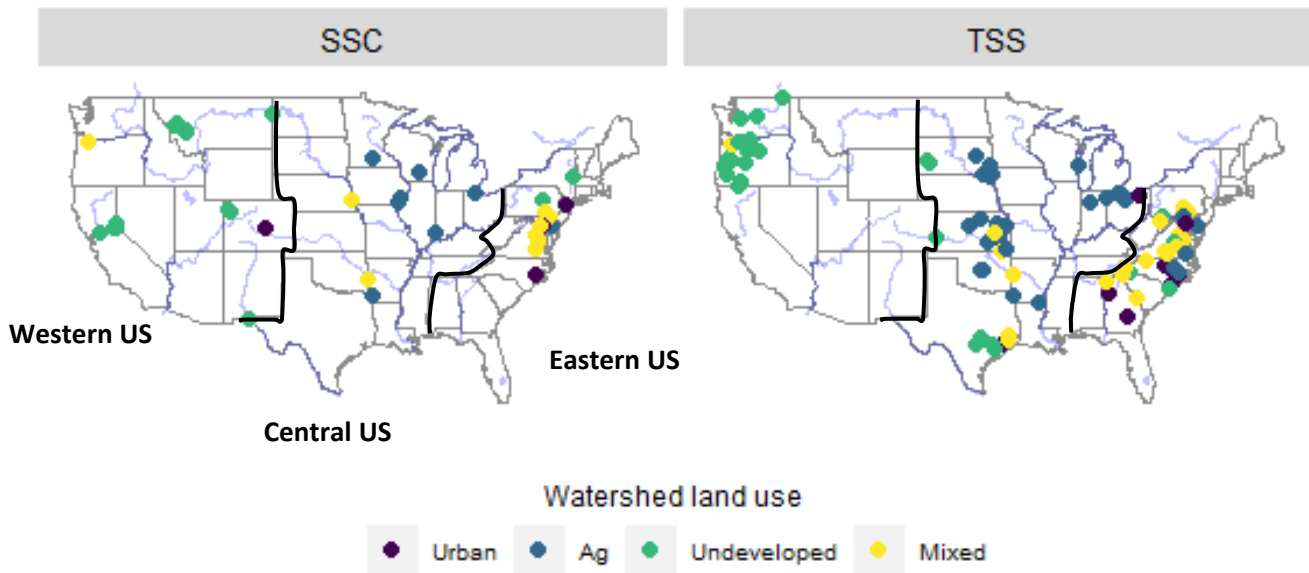

Figure SM-2. Land-use categorization of each site in 2012, shown by parameter.

SSC trends: 1992–2012

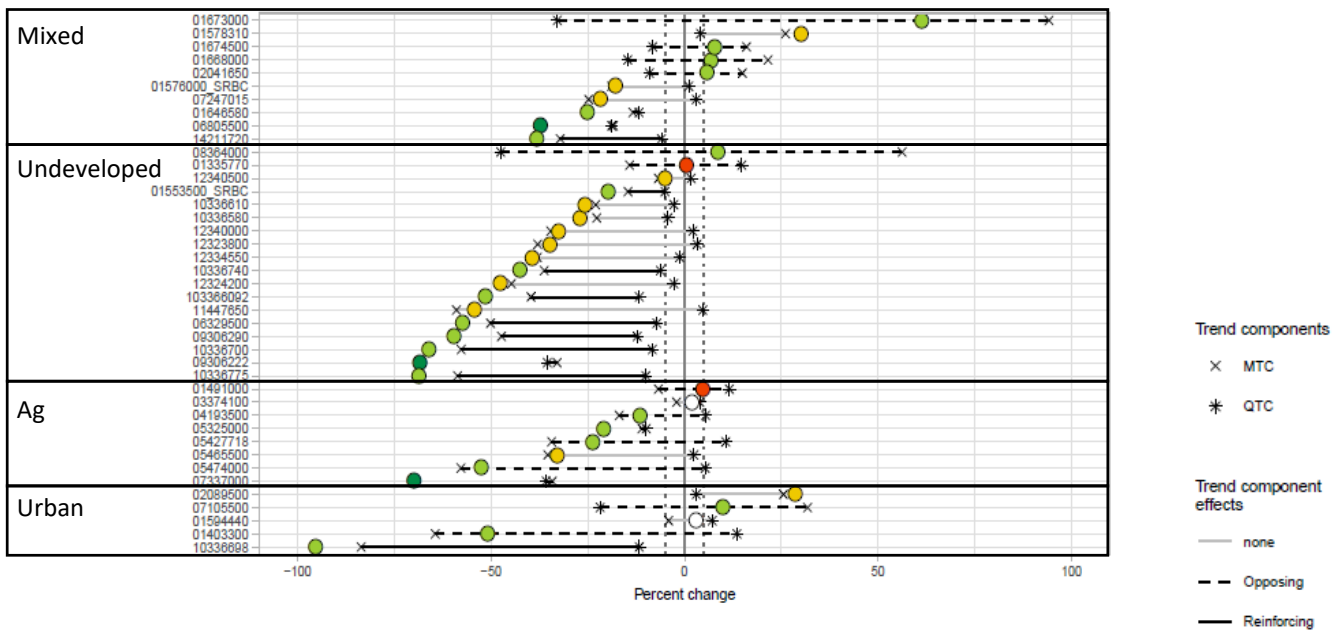

TSS trends: 1992–2012

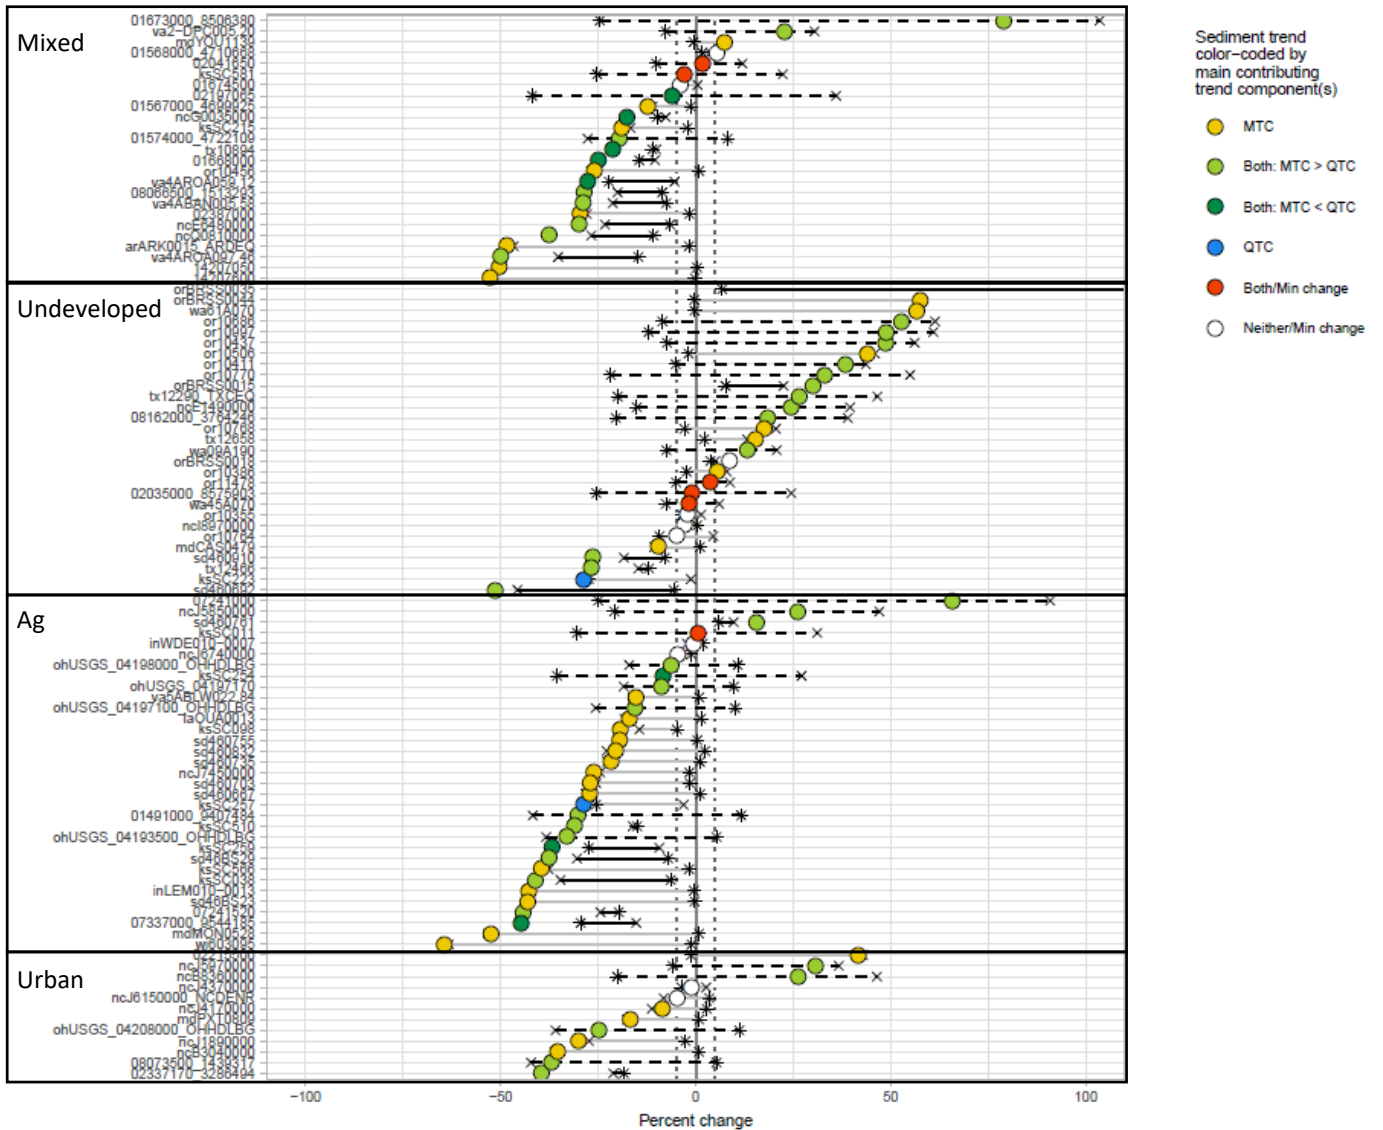

Figure SM-3. Percent change in 1992–2012 sediment trends and trend components (MTC and QTC), grouped by 2012 land-use category and ordered by increasing magnitudes of change within each category. Dashed horizontal lines are  $\pm 5\%$ , an arbitrary threshold for differentiating between negligible and nonnegligible influences from the MTC and QTC, equates to rough 0.25% change per year. Recall sediment trend = MTC + QTC. Also, TSS trend and MTC estimate for site orBRSS0035 are 202% and 195%, respectively, and not shown on plot. Red and white symbols indicate sites where the sediment trend is  $< 5\%$  and the MTC and QTC are also  $> 5\%$  (“Both/Min change”) or  $< 5\%$  (“Neither/Min change”)

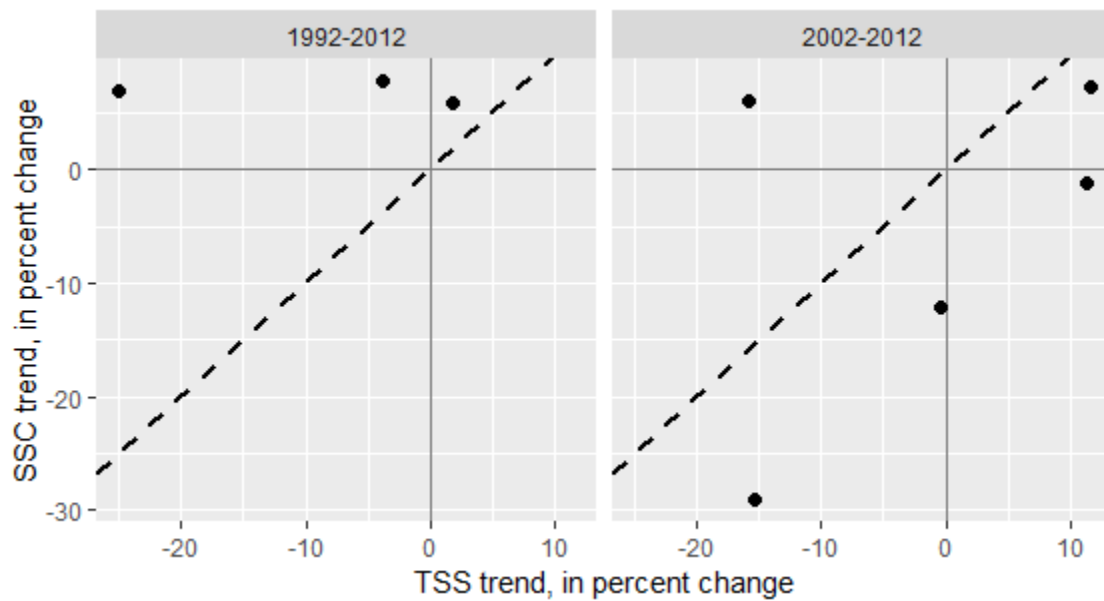

Figure SM-4. SSC trends versus TSS trends at sites where both sediment parameters were collected (3 sites for 1992-2012 trends and 2002-2012 trends). Dashed line is a 1:1 line (SSC trend = TSS trend) and solid, gray vertical and horizontal lines are  $x=0$  and  $y=0$ , respectively.
